# Supplementary material for: Identification and Characterization of an Anti-Fibrotic Benzopyran Compound Isolated from Mangrove-Derived Streptomyces xiamenensis
Source: PubMed Central journal article supplement (PMC3347021; doi:10.3390/md10030639), 2012-03-15
Supplement: marinedrugs-10-00639-s001.pdf [file marinedrugs-10-00639-s001.pdf]

## Supplementary Materials

### Identification and characterization of an anti-fibrotic benzopyran compound isolated from mangrove-derived *Streptomyces xiamenensis*

Min-Juan Xu<sup>1,†</sup>, Xiao-Jin Liu<sup>2,3,†</sup>, Yi-Lei Zhao<sup>4</sup>, Dong Liu<sup>5</sup>, Zhen-Hao Xu<sup>4</sup>, Xiao-Meng Lang<sup>5</sup>, Ping Ao<sup>1</sup>, Wen-Han Lin<sup>5</sup>, Song-Lin Yang<sup>2</sup>, Zhi-Gang Zhang<sup>3\*</sup>, Jun Xu<sup>4\*</sup>

- <sup>1</sup> Shanghai Center for Systems Biomedicine, Shanghai Jiao Tong University, Key Laboratory of Systems Biomedicine, Shanghai, 200240, P. R. China
- <sup>2</sup> Department of Plastic Surgery, Shanghai Jiaotong University Affiliated Sixth People's Hospital, Shanghai, 200233, P. R. China
- <sup>3</sup> State Key Laboratory of Oncogenes and Related Genes, Shanghai Cancer Institute, Ren Ji Hospital, Shanghai Jiao Tong University School of Medicine, Shanghai, 200240, P. R. China
- <sup>4</sup> State Key Laboratory of Microbial Metabolism and School of Life Science & Biotechnology, Shanghai JiaoTong University, Shanghai, 200240, P. R. China
- <sup>5</sup> State Key Laboratory of Natural and Biomimetic Drugs, Peking University, Beijing 100191, P. R. China

† These authors contributed equally to this work.

\* Author to whom correspondence should be addressed: E-Mail: xujunn@sjtu.edu.cn (J. X.); Tel.: +86-021-34207208 (J. X.); Fax: +86-021-34207205 (J. X.). E-Mail: zzhang@shsci.org (Z.-G. Zh.); Tel.: +86-021-34206763 (Z.-G. Zh.); Fax: +86-021-34206763 (Z.-G. Zh.).

## Table of contents

|                                                                                                   | Page |
|---------------------------------------------------------------------------------------------------|------|
| ● Figure S1. HPLC separation of Marfey's derivatives of hydrolysed compound <b>1</b> and L/D-Thr. | 3    |
| ● Table S1. HPLC separation of Marfey's derivatives of hydrolysed compound <b>1</b> and L/D-Thr.  | 3    |
| ● Figure S2. $^1\text{H}$ NMR spectrum of compound <b>1</b> in $\text{DMSO-}d_6$ .                | 4    |
| ● Figure S3. $^{13}\text{C}$ NMR spectrum of compound <b>1</b> in $\text{DMSO-}d_6$ .             | 4    |
| ● Figure S4. HMQC spectrum of compound <b>1</b> in $\text{DMSO-}d_6$ .                            | 5    |
| ● Figure S5. HMBC spectrum of compound <b>1</b> in $\text{DMSO-}d_6$ .                            | 5    |
| ● Figure S6. COSY spectrum of compound <b>1</b> in $\text{DMSO-}d_6$ .                            | 6    |
| ● Figure S7. NOESY spectrum of compound <b>1</b> in $\text{DMSO-}d_6$ .                           | 6    |
| ● Figure S8. $^1\text{H}$ NMR spectrum of compound <b>1</b> in $[\text{D}_4]$ methanol.           | 7    |
| ● Figure S9. IR spectrum of compound <b>1</b> .                                                   | 7    |
| ● Figure S10. UV spectrum of compound <b>1</b> .                                                  | 8    |
| ● Figure S11. CD spectrum of compound <b>1</b> .                                                  | 8    |
| ● Figure S12. HRMS spectra of compound <b>1</b> (positive mode).                                  | 9    |
| ● Figure S13. HRMS spectra of compound <b>1</b> (negative mode).                                  | 10   |
| ● Data comparison of <b>1</b> and the know compound [14]                                          | 11   |

## General

Resolution of 2,4-dinitrophenyl-5-L-alanine amide (DNPA) amino acids: DNPA-L-Thr, DNPA-D-Thr, and DNPA-hydrolysed **1** was resolved by HPLC on a Welch XB-C18 column (4.6 mm × 150 mm, 5 μm) with UV detection monitored at 340 nm. For mobile phase, 0.05% trifluoroacetic acid (TFA) and 1% methanol was used in both A and B solution. Mobile phase A and B consisted of 5% acetonitrile and 60% acetonitrile, respectively. Linear gradients started with 0% B and finished with 100% B in 45 min, plus 15 min equilibrium of system at the beginning.

**Figure S1.** HPLC separation of Marfey's derivatives of hydrolysed compound **1** and L/D-Thr. Note: Retention time of FDAA: 41.3 min.

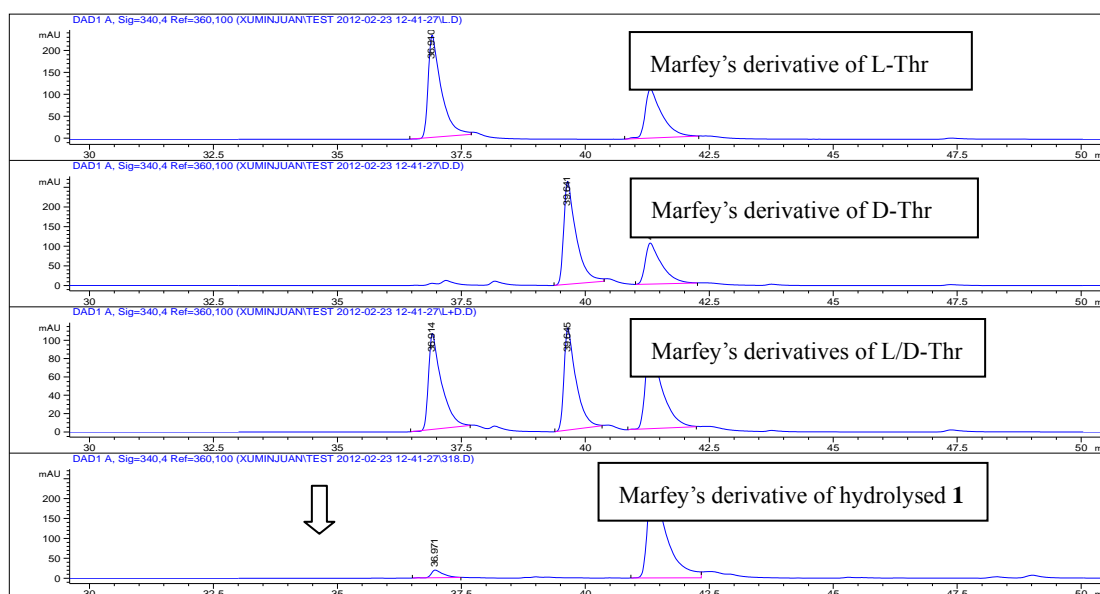

**Table S1.** HPLC separation of Marfey's derivatives of hydrolysed compound **1** and L/D-Thr.

| Sample                       | Retention time of Marfey's derivatives (min) |      |
|------------------------------|----------------------------------------------|------|
|                              | L                                            | D    |
| Thr                          | 36.9                                         | 39.6 |
| Hydrolysed compound <b>1</b> | 36.9                                         | --   |

**Figure S2.**  $^1\text{H}$  NMR spectrum of compound **1** in  $\text{DMSO-}d_6$ .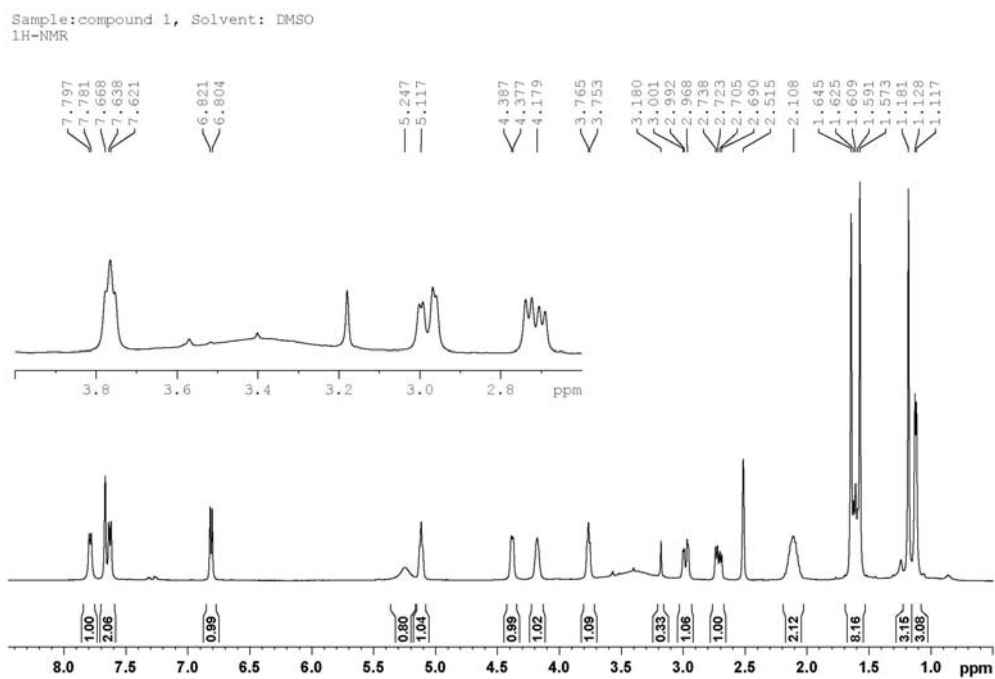**Figure S3.**  $^{13}\text{C}$  NMR spectrum of compound **1** in  $\text{DMSO-}d_6$ .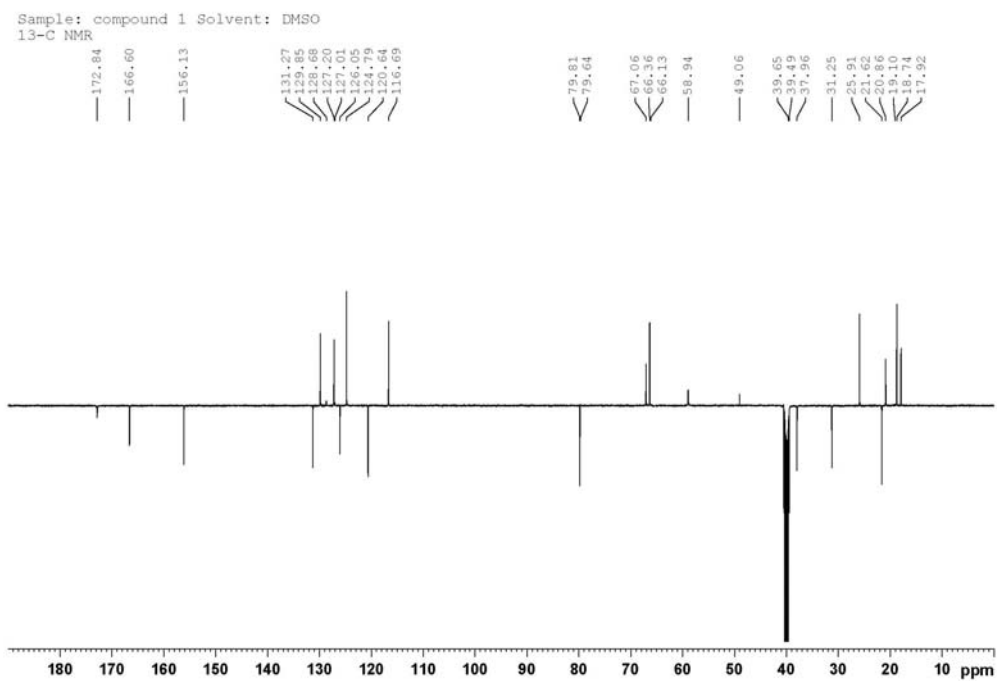

**Figure S4.** HMQC spectrum of compound **1** in DMSO- $d_6$ .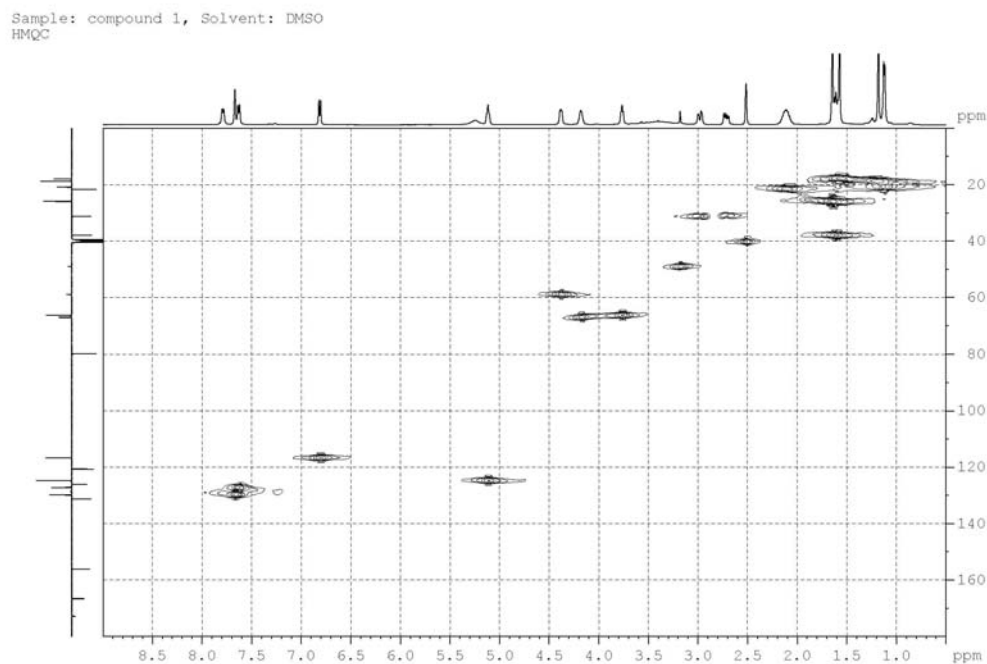**Figure S5.** HMBC spectrum of compound **1** in DMSO- $d_6$ .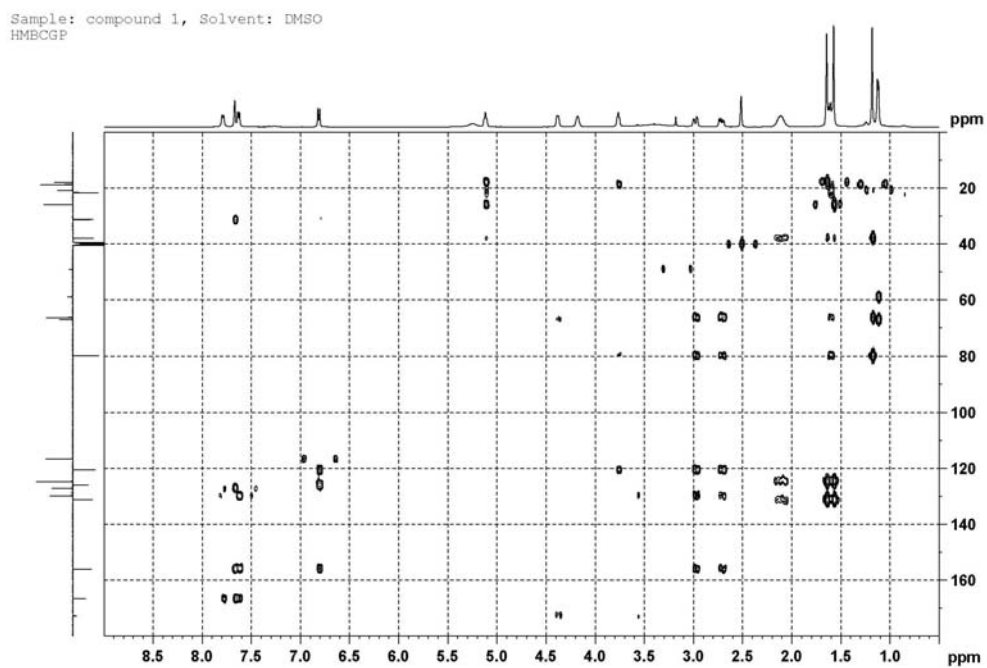

**Figure S6.** COSY spectrum of compound **1** in DMSO- $d_6$ .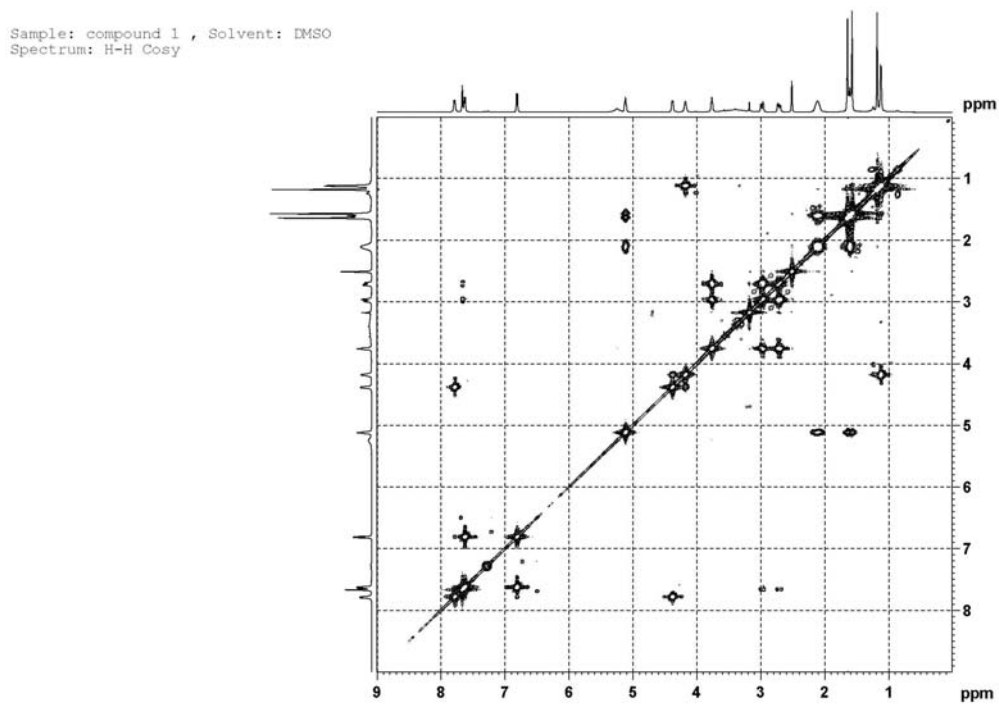**Figure S7.** NOESY spectrum of compound **1** in DMSO- $d_6$ .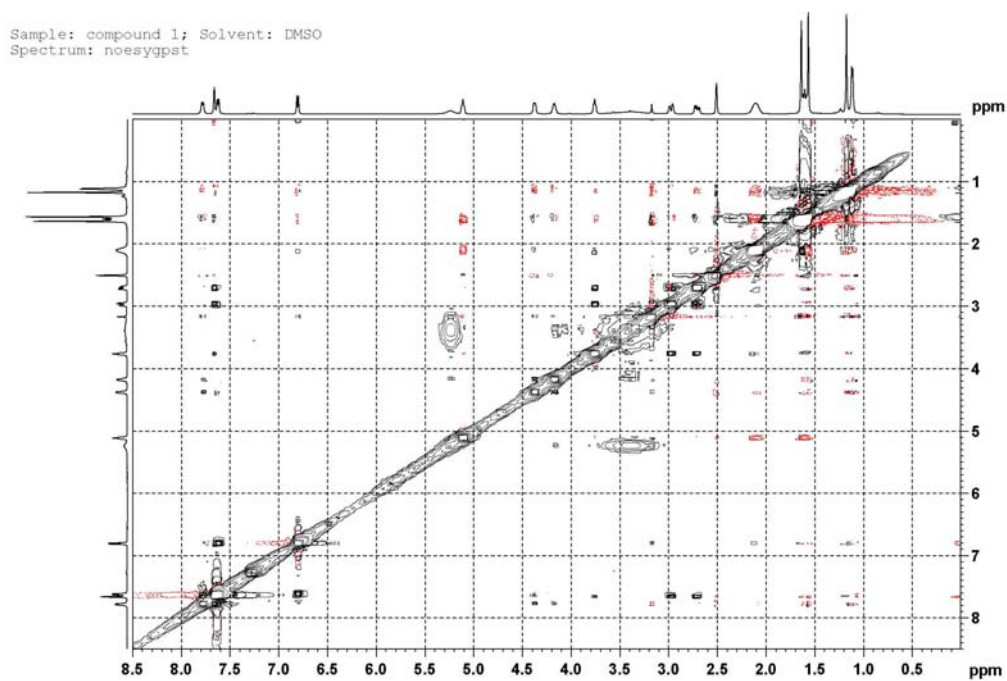

**Figure S8.**  $^1\text{H}$  NMR spectrum of compound **1** in  $[\text{D}_4]$ methanol.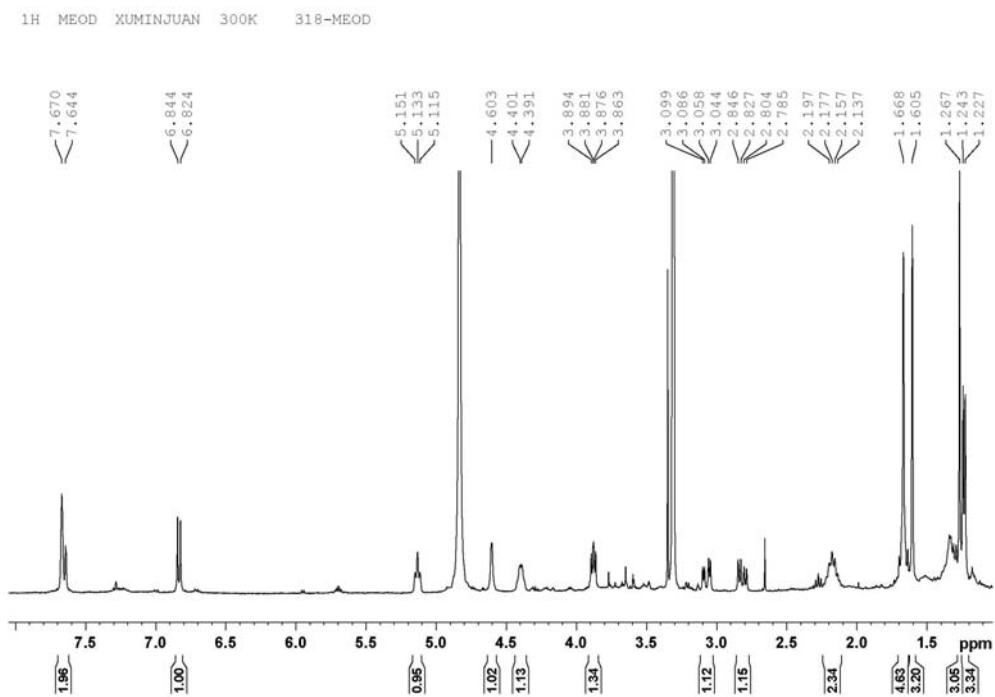**Figure S9.** IR spectrum of compound **1**.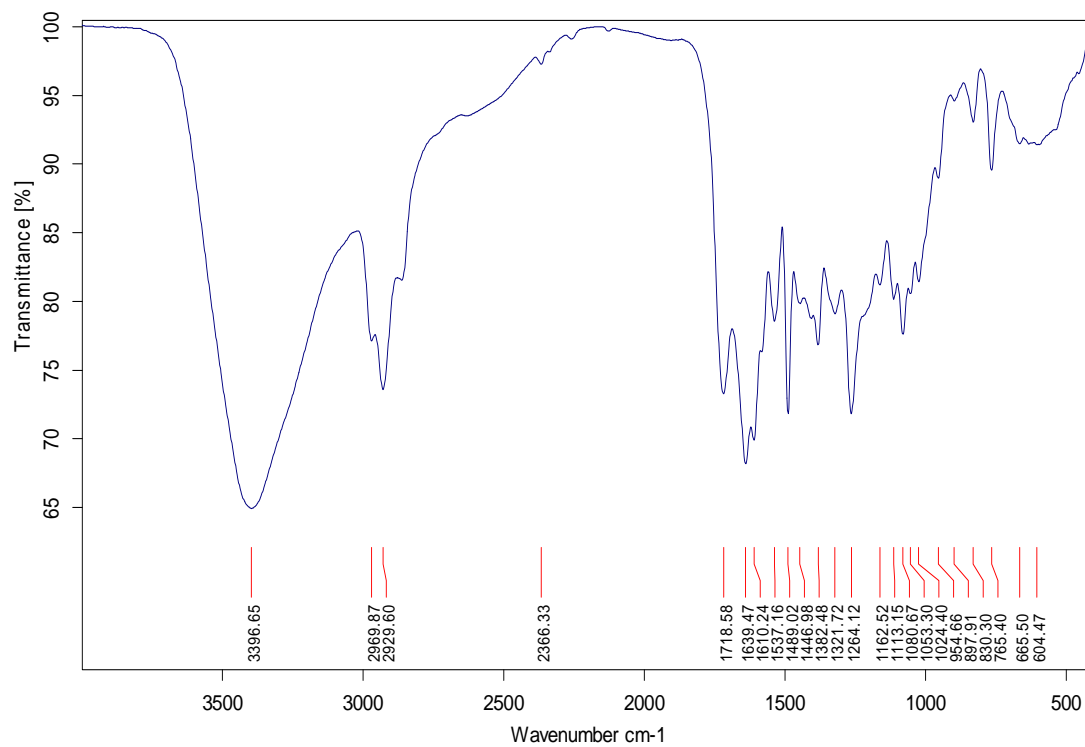

**Figure S10.** UV spectrum of compound **1** (online detection by HPLC).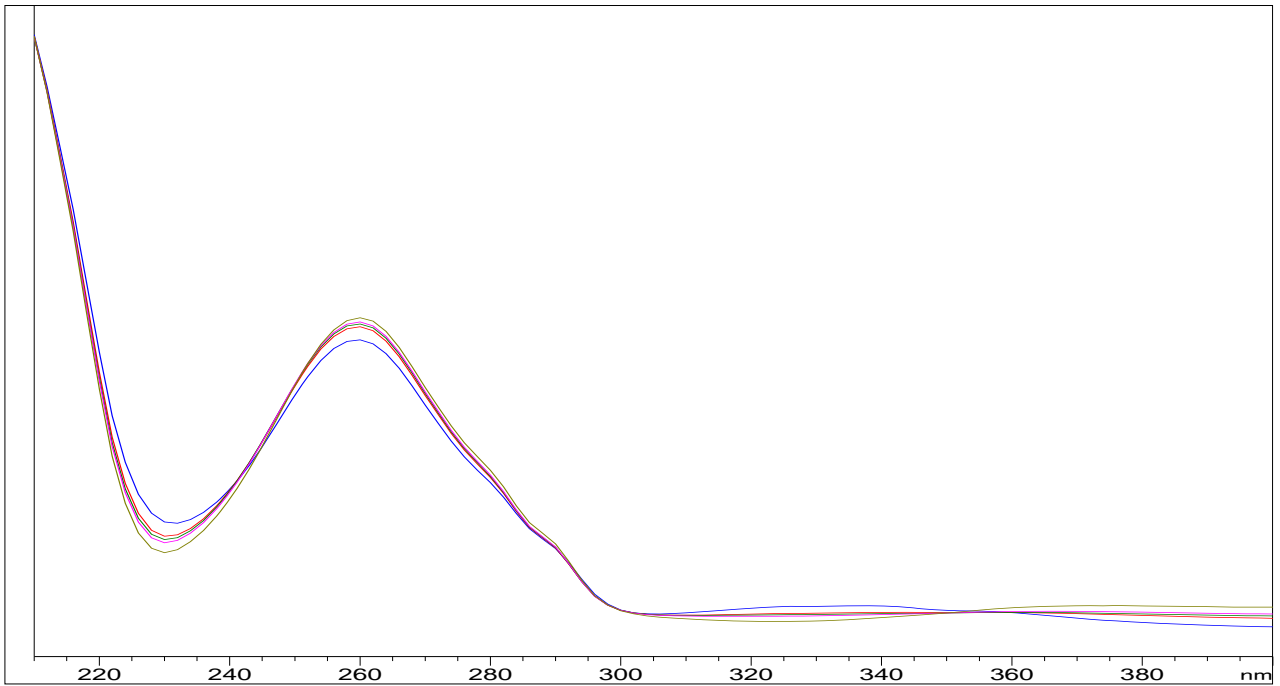**Figure S11.** CD spectrum of compound **1**.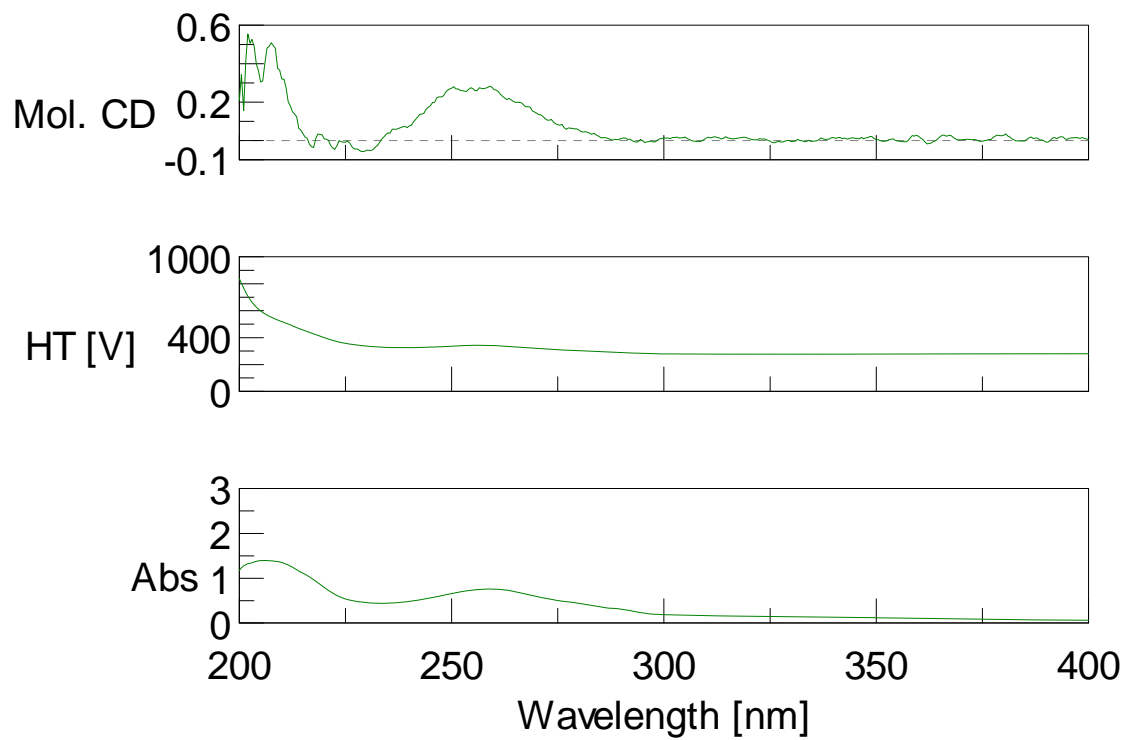



**Figure S12.** HRESIMS spectra of compound **1** (Positive mode).

| Mass     | Calc. Mass | mDa   | PPM   | DBE  | i-FIT | Norm  | Conf (%) | Formula      |
|----------|------------|-------|-------|------|-------|-------|----------|--------------|
| 392.2069 | 392.2073   | -0.4  | -1.0  | 7.5  | 27.0  | 1.147 | 31.76    | C21 H30 N 06 |
|          | 392.2226   | -15.7 | -40.0 | 11.5 | 28.0  | 2.058 | 12.77    | C25 H30 N 03 |
|          | 392.1862   | 20.7  | 52.8  | 12.5 | 27.3  | 1.442 | 23.64    | C24 H26 N 04 |
|          | 392.2437   | -36.8 | -93.8 | 6.5  | 27.0  | 1.145 | 31.83    | C22 H34 N 05 |

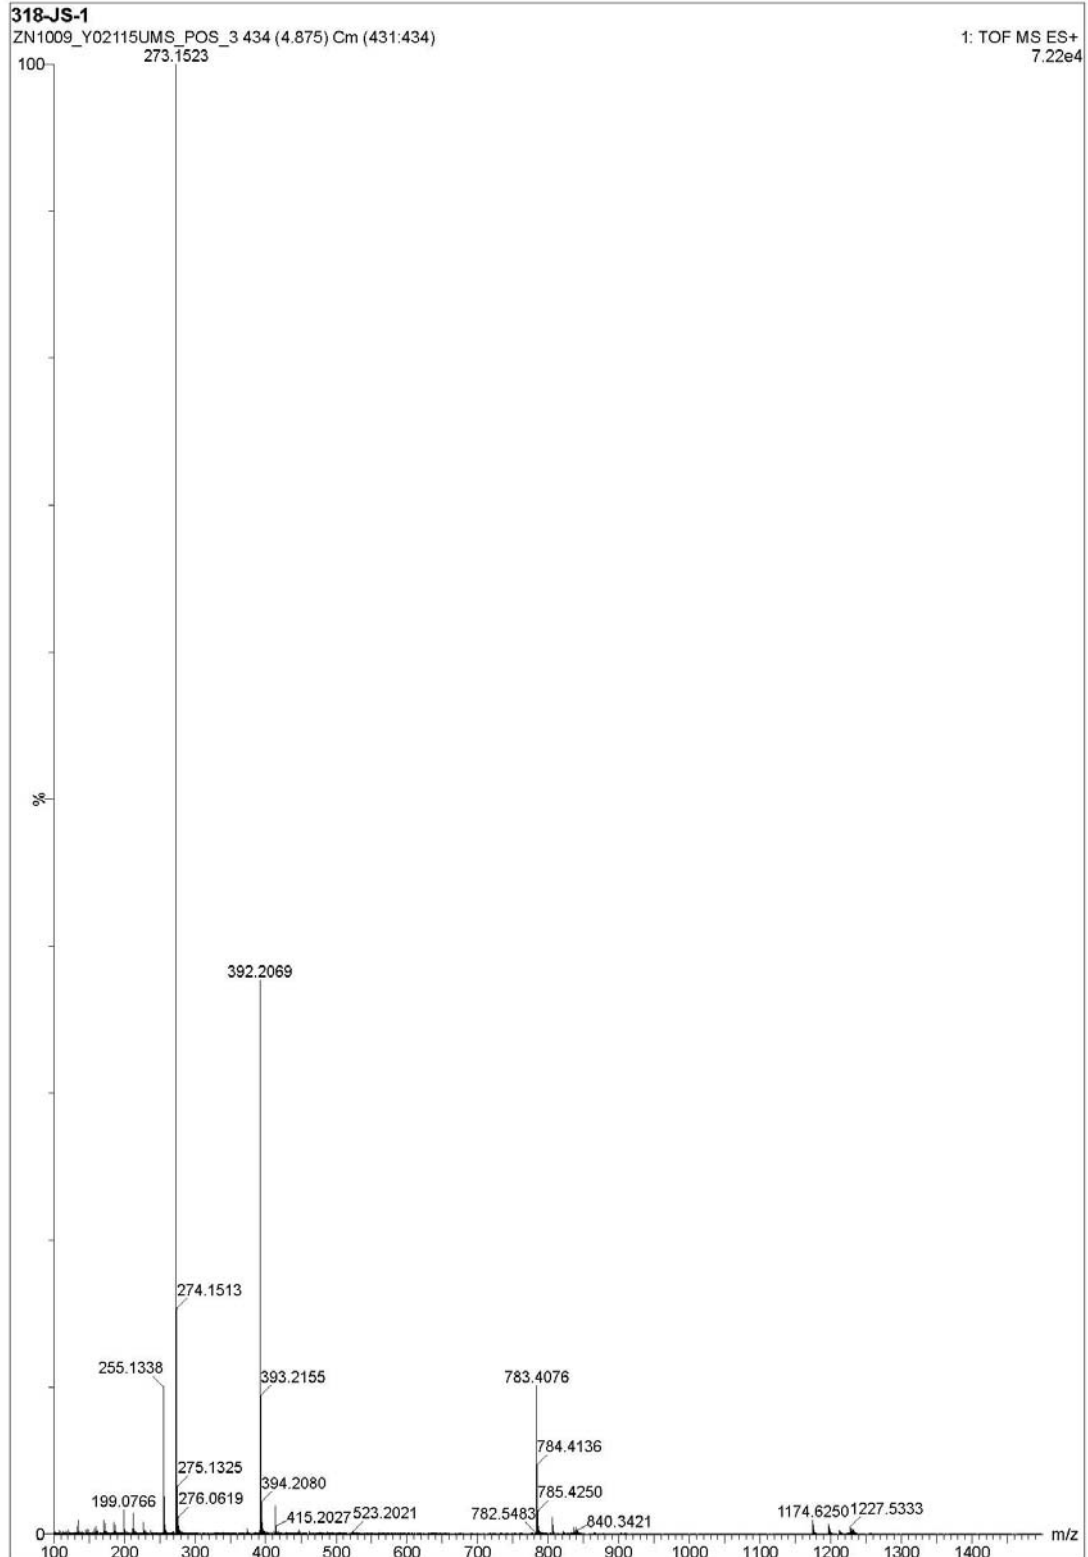

**Figure S13.** HRESIMS spectra of compound **1** (Negative mode).

| Mass     | Calc. Mass | mDa  | PPM  | DBE  | i-FIT | Norm  | Conf (%) | Formula                                          |
|----------|------------|------|------|------|-------|-------|----------|--------------------------------------------------|
| 390.1886 | 390.1917   | -3.1 | -7.9 | 8.5  | 37.5  | 0.373 | 68.86    | C <sub>21</sub> H <sub>28</sub> N O <sub>6</sub> |
|          | 390.1858   | 2.8  | 7.2  | 17.5 | 38.3  | 1.167 | 31.14    | C <sub>28</sub> H <sub>24</sub> N O              |

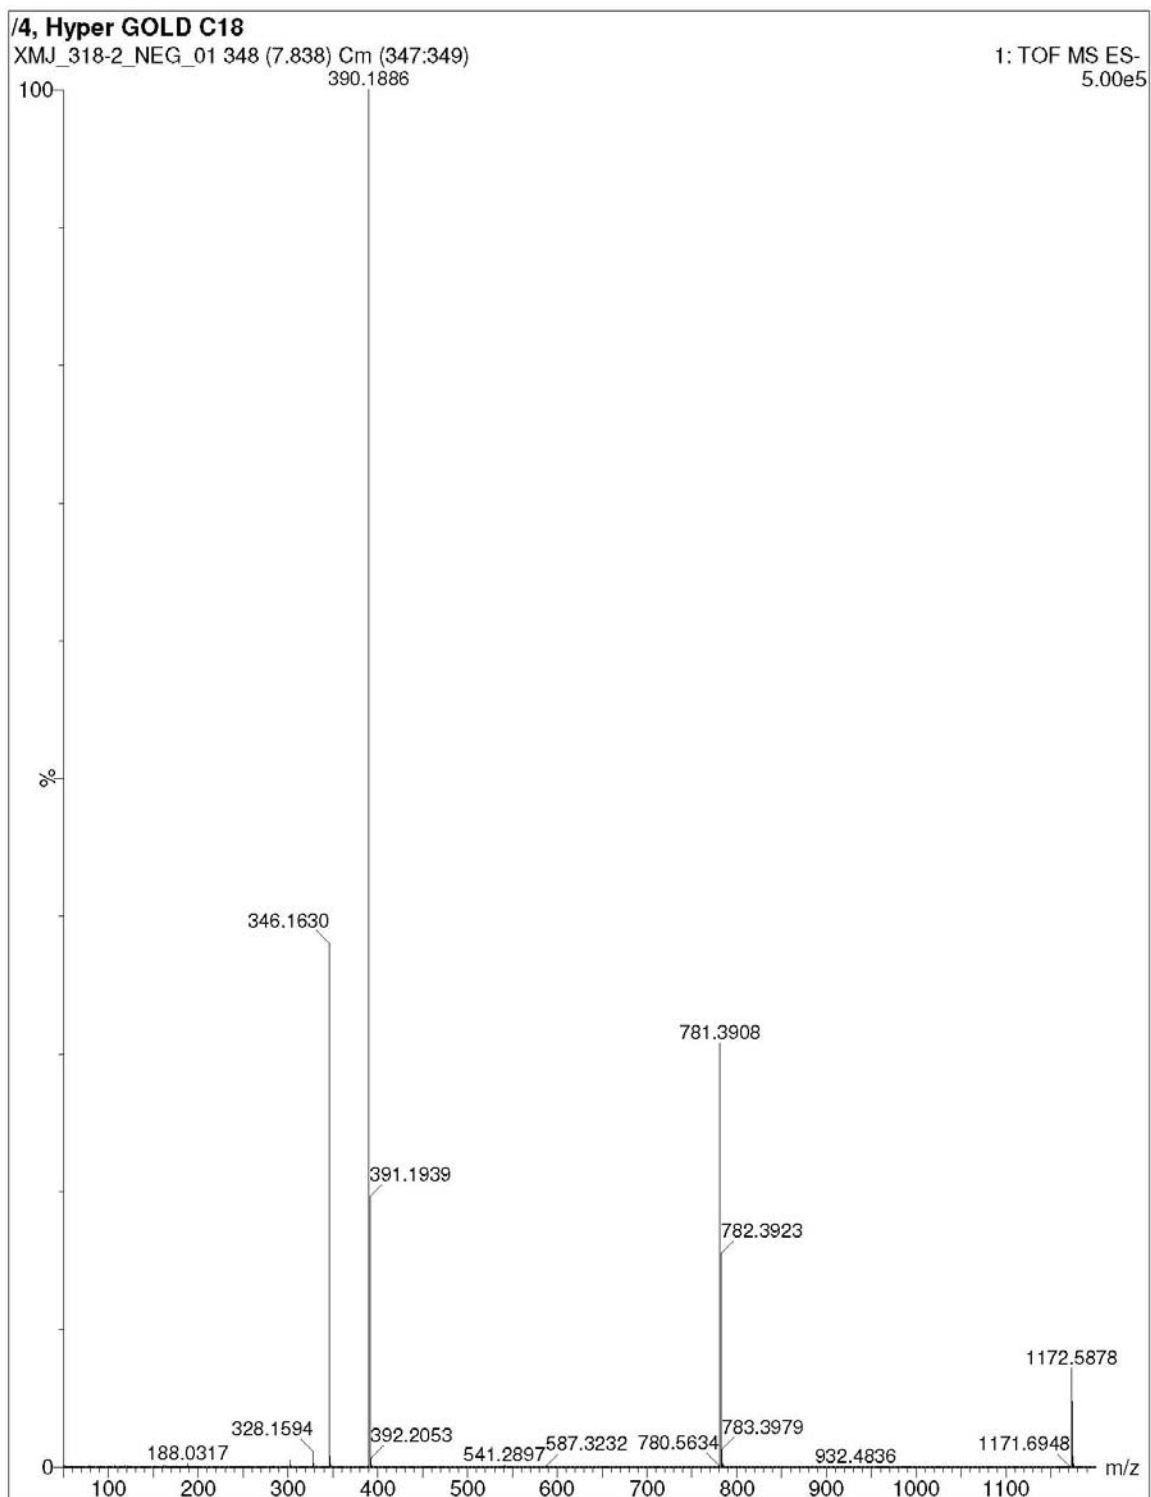

Data comparison of **1** and the know compound [14]

1) IR data from reference 14 (KBr): 3866, 3383, 2976, 2932, 1730, 1640, 1611, 1578, 1539, 1491, 1422, 1379, 1321, 1265, 1200, 1157, 1113, 1082, 1016, 952, 897, 833, 767, 667 cm<sup>-1</sup>.

IR data of compound **1** (KBr): 3396, 2969, 2929, 1718, 1639, 1610, 1579, 1537, 1489, 1446, 1382, 1321, 1264, 1201, 1162, 1113, 1080, 1024, 954, 897, 830, 765, 665 cm<sup>-1</sup>.

2) <sup>13</sup>C-NMR data from reference 14 (CD<sub>3</sub>OD): 178.3 s, 169.7 s, 157.9 s, 132.5 s, 130.8 d, 128.1 d, 126.8 d, 125.4 d, 121.4 s, 118.0 d, 80.5 s, 69.3 d, 68.3 d, 60.8 d, 38.9 t, 32.0 t, 25.9 q, 22.6 t, 20.1 q, 18.9 q, 17.7 q.

<sup>13</sup>C-NMR data of compound **1** (CD<sub>3</sub>OD): 170.0 s, 157.9 s, 132.5 s, 130.7 d, 128.0 d, 126.9 d, 125.3 d, 121.5 s, 118.0 d, 80.7 s, 68.9 d, 68.3 d, 60.8 d, 38.9 t, 32.0 t, 25.8 q, 22.6 t, 20.6 q, 18.9 q, 17.6 q. (The carbon signal of C-6 can't be detected due to limited amount. Please find the full set of carbon signals of compound **1** in Table 1 or in Figure S3.)

3) <sup>1</sup>H-NMR data from reference 14 (CD<sub>3</sub>OD): 7.67 (1H, s), 7.66 (1H, d), 6.83 (1H, d), 5.13 (1H, t), 4.63 (1H, d), 4.41 (1H, dq), 3.88 (1H, dd), 3.07 (1H, dd), 2.81 (1H, dd), 2.16 (2H, m), 1.66 (3H, s), 1.66 (2H, m), 1.60 (3H, s), 1.26 (3H, s), 1.21 (3H, d).

<sup>1</sup>H -NMR data of compound **1** (CD<sub>3</sub>OD): 7.67 (1H, s), 7.65 (1H, d), 6.83 (1H, d), 5.13 (1H, t), 4.60 (1H, d), 4.40 (1H, dq), 3.88 (1H, dd), 3.07 (1H, dd), 2.81 (1H, dd), 2.18 (2H, m), 1.67 (3H, s), 1.66 (2H, m), 1.60 (3H, s), 1.27 (3H, s), 1.23 (3H, d).

Reference 14: Kawamura, N.; Tsuji, E.; Watanabe, Y.; Tsuchihashi, K.; Takako, T. Benzopyran derivatives, their manufacture with *Streptomyces* species, and their use for treatment of asthma and rheumatoid arthritis. Daiichi Seiyaku Co., Ltd.; Mercian Corp.: Kyoto, Japan, 7 March 2000. Available online:

[http://worldwide.espacenet.com/publicationDetails/biblio?DB=EPODOC&II=0&ND=3&adjacent=true&locale=en\\_EP&FT=D&date=20000307&CC=JP&NR=2000072766A&KC=A](http://worldwide.espacenet.com/publicationDetails/biblio?DB=EPODOC&II=0&ND=3&adjacent=true&locale=en_EP&FT=D&date=20000307&CC=JP&NR=2000072766A&KC=A)
